# Supplementary material
Source: Springer Nature journal article supplement (https://www.springermedizin.de/resource/supplementary/12889_2012_4521_MOESM3_ESM.pdf/9491478)
Supplement: MOESM3 [file 9491478]

## INCLUSION INITIAL SCREENING

**Assessed for eligibility initial screening ( $n=10,583$ )**  
(10,420 selected via family physicians' registers and 163 volunteers)

### Excluded ( $n=8276$ ):

- Not meeting inclusion criteria ( $n=1658$ )
- Declined to participate ( $n=1804$ )
- Other reasons ( $n=49$ )
- No shows ( $n=298$ )
- Not reached ( $n=4467$ )

### Screened ( $n=2307$ )

Participation within age groups: 18–34 years, 14.2%; 35–44 years, 23.3%; 45–60 years, 31.1%  
Participation within gender groups: 18.5% men, 24.8% women

### Excluded:

- With normoglycemia\* ( $n=1197$ )
- Had DM\*\* ( $n=65$ )

## TRIAL INCLUSION

**At high risk of diabetes and assessed for eligibility RCT ( $n=1045$ )**

### Excluded ( $n=403$ ):

- Not meeting inclusion criteria ( $n=67$ )
- Actively declined ( $n=158$ )
- Other reasons ( $n=16$ )
- Not reached ( $n=162$ )

**Randomized ( $n=642$ )**

### Allocated to intervention group ( $n=332$ )

- Completed baseline measurements ( $n=283$ )
- No show ( $n=35$ )
- Had DM during baseline measurement RCT ( $n=14$ )

**In intervention group ( $n=283$ )**

### Allocated to control group ( $n=310$ )

- Completed baseline measurements ( $n=253$ )
- No show ( $n=49$ )
- Had DM during baseline measurement RCT ( $n=8$ )

**In control group ( $n=253$ )**

## INCLUSION INITIAL SCREENING

**Assessed for eligibility initial screening ( $n=10,583$ )**  
(10,420 selected via family physicians' registers and 163 volunteers)

### Excluded ( $n=8276$ ):

- Not meeting inclusion criteria ( $n=1658$ )
- Declined to participate ( $n=1804$ )
- Other reasons ( $n=49$ )
- No shows ( $n=298$ )
- Not reached ( $n=4467$ )

### Screened ( $n=2307$ )

Participation within age groups: 18–34 years, 14.2%; 35–44 years, 23.3%; 45–60 years, 31.1%  
Participation within gender groups: 18.5% men, 24.8% women

### Excluded:

- With normoglycemia\* ( $n=1197$ )
- Had DM\*\* ( $n=65$ )

## TRIAL INCLUSION

**At high risk of diabetes and assessed for eligibility RCT ( $n=1045$ )**

### Excluded ( $n=403$ ):

- Not meeting inclusion criteria ( $n=67$ )
- Actively declined ( $n=158$ )
- Other reasons ( $n=16$ )
- Not reached ( $n=162$ )

**Randomized ( $n=642$ )**

### Allocated to intervention group ( $n=332$ )

- Completed baseline measurements ( $n=283$ )
- No show ( $n=35$ )
- Had DM during baseline measurement RCT ( $n=14$ )

**In intervention group ( $n=283$ )**

### Allocated to control group ( $n=310$ )

- Completed baseline measurements ( $n=253$ )
- No show ( $n=49$ )
- Had DM during baseline measurement RCT ( $n=8$ )

**In control group ( $n=253$ )**
